# Supplementary material for: Mixed H2O/H2 plasma-induced redox reactions of thin uranium oxide films under UHV conditions
Source: Royal Society of Chemistry journal article supplement (doi:10.1039/d1dt01020d), 2021-01-01
Supplement: d1dt01020d1.pdf [file d1dt01020d1.pdf]

ARTICLE

## Supplementary: Mixed H<sub>2</sub>O/H<sub>2</sub> Plasma-Induced Redox Reactions of Thin Uranium Oxide Films under UHV Conditions

Received 00th January 20xx,  
Accepted 00th January 20xx

DOI: 10.1039/x0xx00000x

Ghada El Jamal,<sup>a\*</sup> Thomas Gouder,<sup>b</sup> Rachel Eloirdi,<sup>b</sup> Evgenia Tereshina-Chitrova,<sup>c,d</sup> Lukáš Horákd<sup>d</sup>

and Mats Jonsson,<sup>a</sup>

### Peak fitting details

The following table contains information about U4f XPS peak parameters which were used as references in the fitting routine.

| Oxidation states | Binding energy (eV) of U4f7/2 | Binding energy (eV) of U4f5/2 | Spin orbit splitting of U4f main lines (eV) | FWHM (eV) of U4f7/2 | Satellite peaks separation from U4f5/2 |
|------------------|-------------------------------|-------------------------------|---------------------------------------------|---------------------|----------------------------------------|
| U(IV)            | 380.1                         | 390.9                         | 10.7                                        | 1.5                 | 6.7                                    |
| U(V)             | 380.4                         | 391.3                         | 11.2                                        | 1.46                | 8.1                                    |
| U(VI)            | 381.1                         | 391.8                         | 10.7                                        | 1.2                 | 4.4 and 9.9                            |

O1s XPS spectra  
The O1s

spectra of the different conditions applied to UO<sub>2</sub>, U<sub>2</sub>O<sub>5</sub> and UO<sub>3</sub> films are plotted after being shifted to the same low binding energy of the unexposed film. Each spectrum corresponding for the different conditions is also plotted separately with the spectrum of the unexposed film.

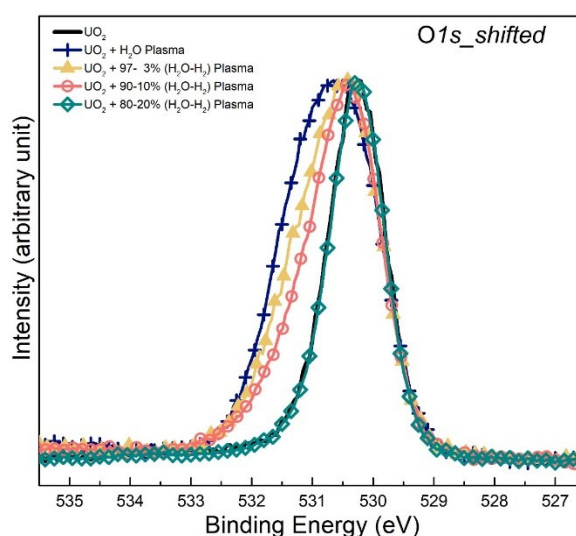

**Figure 1** X-ray photoemission spectra of the O1s core level line recorded for the precursor and plasma treated films after being shifted to the lower binding energy side of UO<sub>2</sub> film. Films exposed to pure water plasma and mixed gas plasma of water and hydrogen.

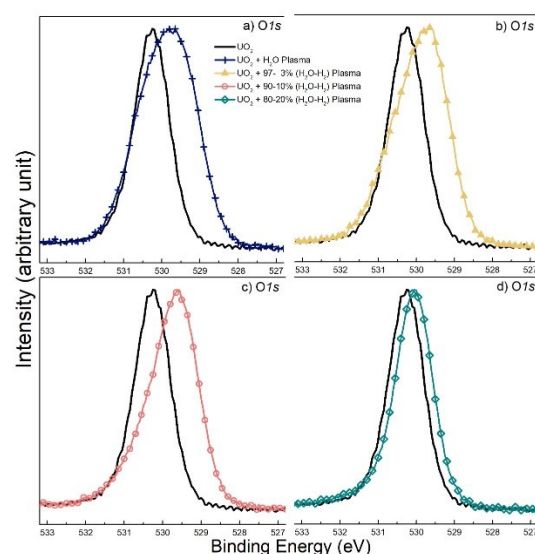

**Figure 2** X-ray photoemission spectra of the O1s core level line recorded for

<sup>a</sup> School of Engineering Sciences in Chemistry, Biotechnology and Health (CBH), Department of Chemistry, Applied Physical Chemistry, KTH Royal Institute of Technology, SE-100 44 Stockholm, Sweden

<sup>b</sup> European Commission, Joint Research Centre, Postfach 2340, DE-76215 Karlsruhe, Germany

<sup>c</sup> Institute of Physics, ASCR, Prague, Czech Republic

<sup>d</sup> Faculty of Mathematics and Physics, Charles University, 12116 Prague, Czech Republic

the precursor and plasma treated films. Films exposed to pure water plasma and mixed gas plasma of water and hydrogen.

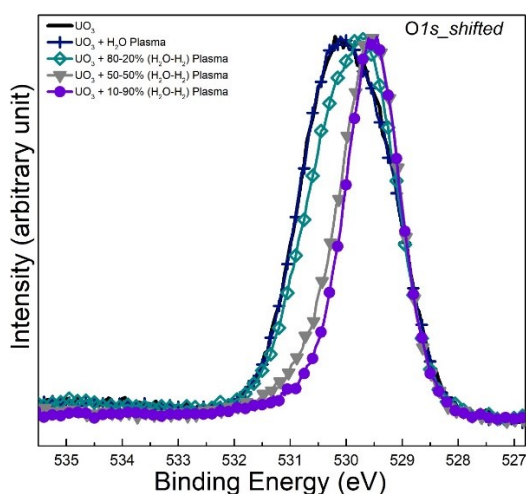

**Figure 3** X-ray photoemission spectra of the O1s core level line recorded for the precursor and plasma treated films after being shifted to the lower binding energy side of  $\text{UO}_3$  film. Films exposed to pure water plasma and mixed gas plasma of water and hydrogen.

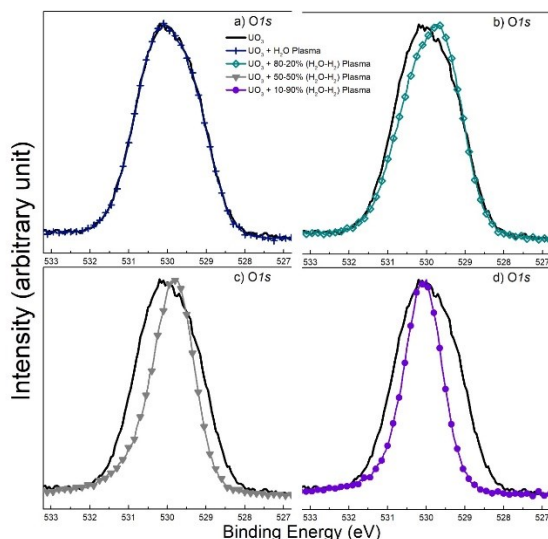

**Figure 4** X-ray photoemission spectra of the O1s core level line recorded for the precursor and plasma treated films. Films exposed to pure water plasma and mixed gas plasma of water and hydrogen.

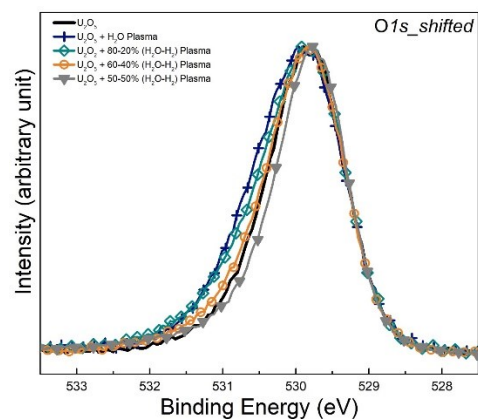

**Figure 5** X-ray photoemission spectra of the O1s core level line recorded for the precursor and plasma treated films after being shifted to the lower

binding energy side of  $\text{U}_2\text{O}_5$  film. Films exposed to pure water plasma and mixed gas plasma of water and hydrogen.

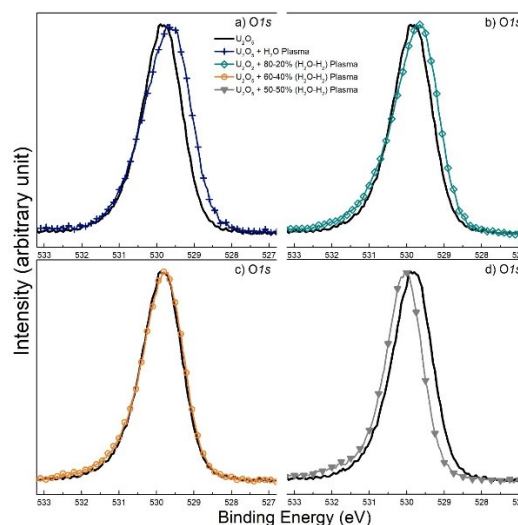

**Figure 6** X-ray photoemission spectra of the O1s core level line recorded for the precursor and plasma treated films. Films exposed to pure water plasma and mixed gas plasma of water and hydrogen.

### Crystal structure of different uranium oxides

In the text when we refer to the similar structures of  $\text{UO}_3$ ,  $\text{U}_2\text{O}_5$  and  $\text{U}_3\text{O}_8$ , we refer to the lamellar and orthorhombic structure in contrast to the cubic structure observed for  $\text{UO}_2$ . Indeed  $\text{UO}_3$  displays more reported polymorphism than any of the other oxides, with a reported seven crystalline polymorphs and one amorphous phase [Hoekstra et al. *Journal of Inorganic & Nuclear Chemistry*, 1970, 32(10), 3237-3248. Siegel et al. *Acta Crystallographica*, 1966, 20, 292-295].  $\gamma\text{-UO}_3$  is reported as the most thermodynamically most stable  $\text{UO}_3$  polymorph. As supplementary information, a table will report the structure of  $\text{UO}_2$ ,  $g\text{-UO}_3$ ,  $d\text{-UO}_3$ ,  $d\text{-U}_2\text{O}_5$ ,  $a\text{-U}_3\text{O}_8$ ,  $b\text{-U}_3\text{O}_8$  together with atomic position in the cell.

**Table 1** The structure of  $\text{UO}_2$ ,  $g\text{-UO}_3$ ,  $d\text{-UO}_3$ ,  $d\text{-U}_2\text{O}_5$ ,  $a\text{-U}_3\text{O}_8$ ,  $b\text{-U}_3\text{O}_8$  with lattice parameters.

| Compound                     | Space group | Unit cell    | a       | b        | c        |
|------------------------------|-------------|--------------|---------|----------|----------|
| $\text{UO}_2$ [1]            | Fm-3m       | fcc          | 5.46380 |          |          |
| $g\text{-UO}_3$ [2]          | Fddd        | orthorhombic | 9.81300 | 19.93000 | 9.71100  |
| $d\text{-UO}_3$ [3]          | Pm-3m       | cubic        | 4.16500 |          |          |
| $d\text{-U}_2\text{O}_5$ [4] | Pnma        | orthorhombic | 6.84900 | 8.27400  | 31.70600 |
| $a\text{-U}_3\text{O}_8$ [5] | Amm2        | orthorhombic | 4.14800 | 11.96600 | 6.71700  |
| $b\text{-U}_3\text{O}_8$ [6] | Cmcm        | orthorhombic | 7.06900 | 11.44500 | 8.30300  |

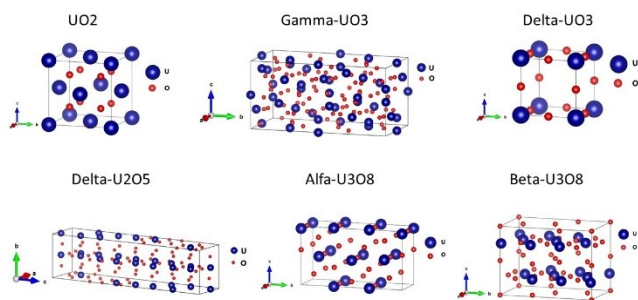

**Figure 7** The atomic position in the cell of  $\text{UO}_2$ ,  $\gamma\text{-UO}_3$ ,  $\delta\text{-UO}_3$ ,  $\delta\text{-U}_2\text{O}_5$ ,  $\alpha\text{-U}_3\text{O}_8$ ,  $\beta\text{-U}_3\text{O}_8$ .

## Notes and references

- [1] Desgranges, L., Baldinozzi, G., Rousseau, G., Niepce, J.C., Calvarin, G. "Neutron diffraction study of the in situ oxidation of  $\text{UO}_2$ ". *Inorg. Chem.* 2009, **48** (16), 7585.
- [2] Siegel S., Hoekstra H. "BOND LENGTHS IN GAMMA-URANIUM TRIOXIDE". *Inorg. Nucl. Chem. Lett.* 1971, **7**, 455.
- [3] M. Weller, P. Dickens, D. Penny. The structure of  $\delta\text{-UO}_3$ , *Polyhedron* 1988, **7**, 243-244.
- [4] Kovba, L.M., N.I. Komarevtseva, and E.U. Kuz'mitcheva, On the Crystal Structures of  $\text{U}_{13}\text{O}_{34}$  and  $\delta\text{-U}_2\text{O}_5$ . *Radiokhimiya*, 1979, **21**, 754-757.
- [5] Loopstra, B.O., Neutron Diffraction Investigation of  $\text{U}_3\text{O}_8$ . *Acta Crystallographica*, 1964, **17**(6), 651-654.
- [6] Loopstra B.O. "The structure of  $\beta\text{-U}_3\text{O}_8$ ". *Acta Crystallogr., Sect. B: Struct. Crystallogr. Cryst. Chem.* 1970, **26**, 656.
